# Supplementary material for: Deep Learning-Based Culture-Free Bacteria Detection in Urine Using Large-Volume Microscopy
Source: MDPI journal article supplement (doi:10.3390/bios14020089), 2024-02-05
Supplement: s1 [file s1]

# Deep Learning-Based Culture-Free Bacteria Detection in Urine Using Large-Volume Microscopy

Rafael Iriya <sup>1,2</sup>, Brandyn Braswell <sup>1,3</sup>, Manni Mo <sup>1,3</sup>, Fenni Zhang <sup>1</sup>, Shelley E. Haydel <sup>1,4</sup>  
and Shaopeng Wang <sup>1,5,\*</sup>

<sup>1</sup> Biodesign Center for Biosensors and Bioelectronics, Arizona State University, Tempe, AZ 85287, USA;  
ririya@asu.edu (R.I.); bbraswe1@asu.edu (B.B.); mannimo@asu.edu (M.M.); fenni.zhang@asu.edu (F.Z.);  
shelley.haydel@asu.edu (S.E.H.)

<sup>2</sup> School of Electrical and Computer Engineering, Tempe, AZ 85287, USA

<sup>3</sup> School of Molecular Sciences, Arizona State University, Tempe, AZ 85287, USA

<sup>4</sup> School of Life Sciences, Arizona State University, Tempe, AZ 85287, USA

<sup>5</sup> School of Biological and Health Systems Engineering, Arizona State University, Tempe, AZ 85287, USA

\* Correspondence: shaopeng.wang@asu.edu

**Supplemental Figure S1**

a) Beads

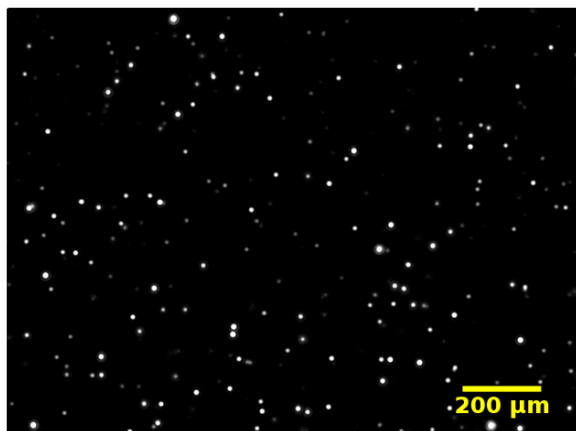b) *E. coli*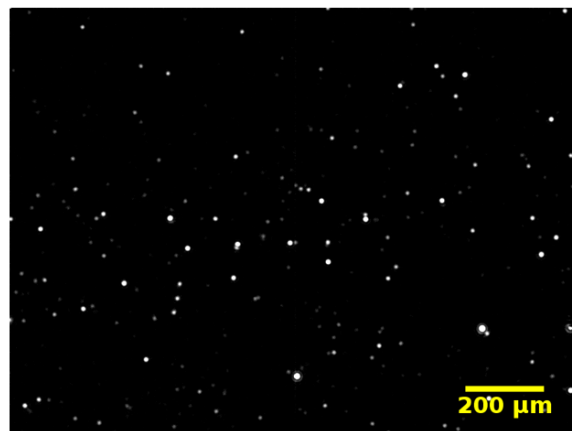

c) Urine

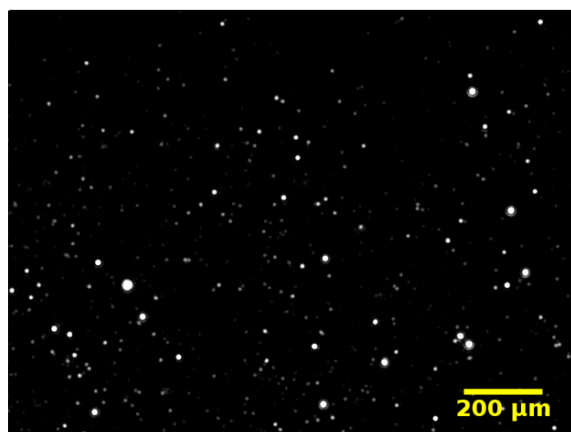

**Figure S1.** Visualization of a) beads, b) *E. coli*, and c) urine particles using the LVM setup.

### Supplemental Figure S2

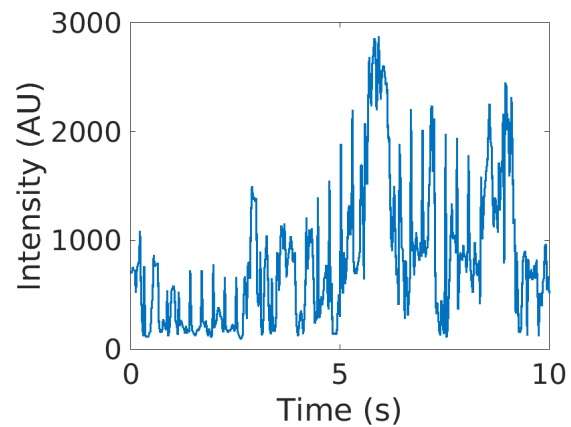

**Figure S2.** Intensity plot of a bead particle revealing its blinking nature.

### Supplemental Figure S3

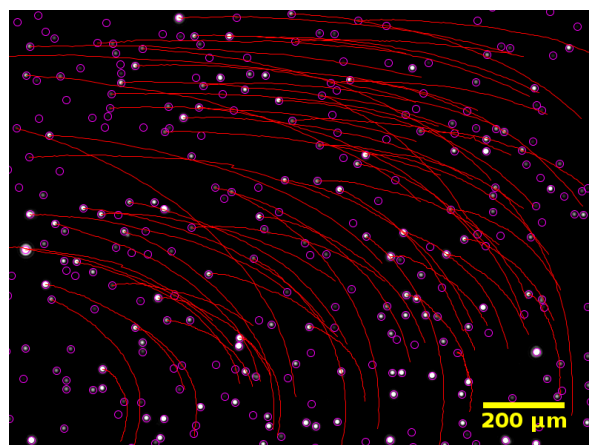

**Figure S3.** Bead tracks revealing the drift.

### Supplemental Figure S4

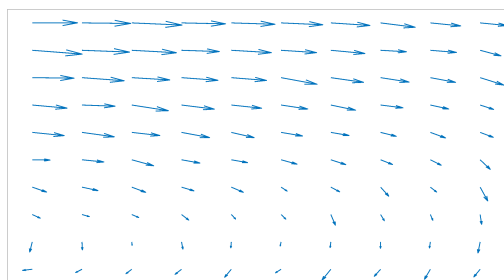

**Figure S4.** Example of drift velocity vectors.

# Supplemental Figure S5

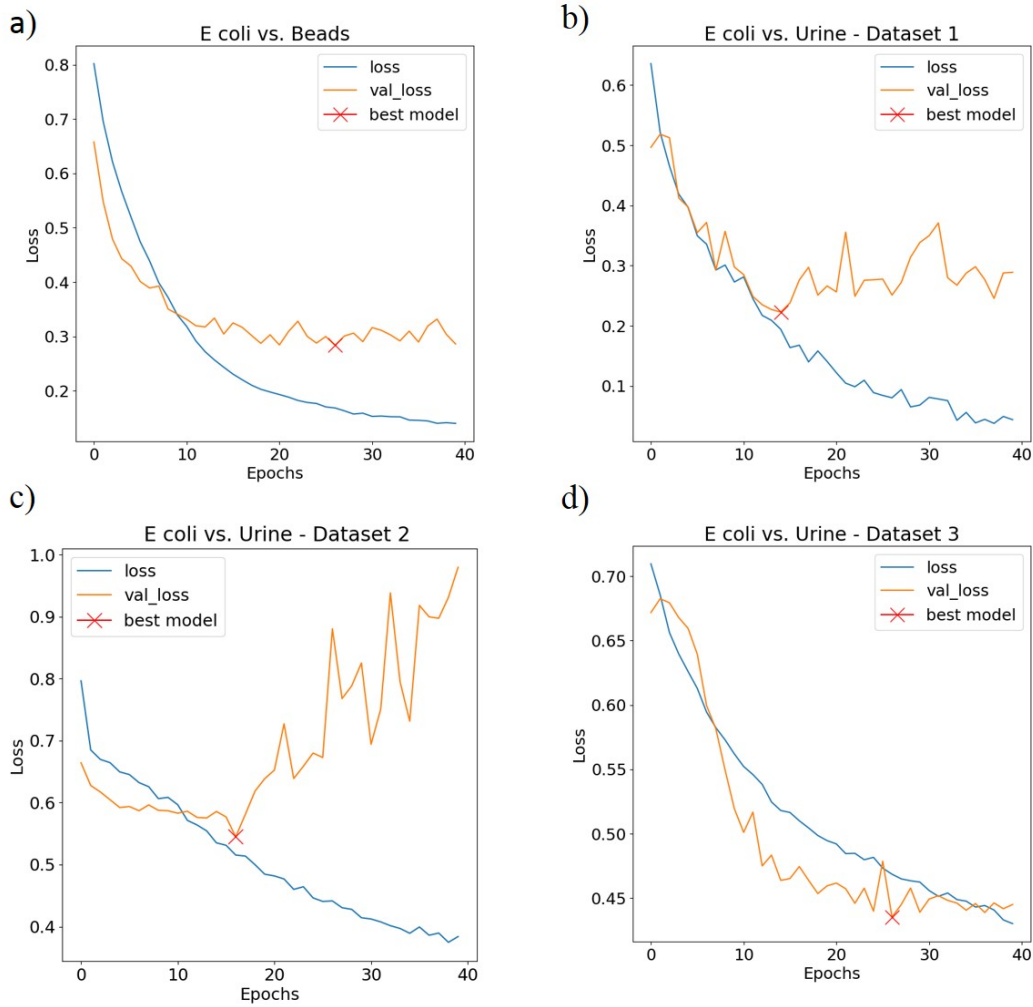

**Figure S5.** Learning curves showing the progression of the cross-entropy loss for the tested datasets.

**Supplemental Table S1**

|                          |                               |                               |
|--------------------------|-------------------------------|-------------------------------|
| MeanPercentMissingFrames | KurtStdIntensity              | 1stDerivKurtQuality           |
| MeanPeakDist             | KurtQuality                   | 2ndDerivMeanCenterIntensity   |
| MeanDetectionRate        | 1stDerivMeanCenterIntensity   | 2ndDerivMeanArea              |
| MeanCenterIntensity      | 1stDerivMeanArea              | 2ndDerivMeanAvgIntensity      |
| MeanArea                 | 1stDerivMeanAvgIntensity      | 2ndDerivMeanStdIntensity      |
| MeanAvgIntensity         | 1stDerivMeanStdIntensity      | 2ndDerivMeanQuality           |
| MeanStdIntensity         | 1stDerivMeanQuality           | 2ndDerivStdCenterIntensity    |
| MeanQuality              | 1stDerivStdCenterIntensity    | 2ndDerivStdArea               |
| StdCenterIntensity       | 1stDerivStdArea               | 2ndDerivStdAvgIntensity       |
| StdArea                  | 1stDerivStdAvgIntensity       | 2ndDerivStdStdIntensity       |
| StdAvgIntensity          | 1stDerivStdStdIntensity       | 2ndDerivStdQuality            |
| StdStdIntensity          | 1stDerivStdQuality            | 2ndDerivPctl25CenterIntensity |
| StdQuality               | 1stDerivPctl25CenterIntensity | 2ndDerivPctl25Area            |
| Pctl25CenterIntensity    | 1stDerivPctl25Area            | 2ndDerivPctl25AvgIntensity    |
| Pctl25Area               | 1stDerivPctl25AvgIntensity    | 2ndDerivPctl25StdIntensity    |
| Pctl25AvgIntensity       | 1stDerivPctl25StdIntensity    | 2ndDerivPctl25Quality         |
| Pctl25StdIntensity       | 1stDerivPctl25Quality         | 2ndDerivPctl75CenterIntensity |
| Pctl25Quality            | 1stDerivPctl75CenterIntensity | 2ndDerivPctl75Area            |
| Pctl75CenterIntensity    | 1stDerivPctl75Area            | 2ndDerivPctl75AvgIntensity    |
| Pctl75Area               | 1stDerivPctl75AvgIntensity    | 2ndDerivPctl75StdIntensity    |
| Pctl75AvgIntensity       | 1stDerivPctl75StdIntensity    | 2ndDerivPctl75Quality         |
| Pctl75StdIntensity       | 1stDerivPctl75Quality         | 2ndDerivSkewCenterIntensity   |
| Pctl75Quality            | 1stDerivSkewCenterIntensity   | 2ndDerivSkewArea              |
| SkewCenterIntensity      | 1stDerivSkewArea              | 2ndDerivSkewAvgIntensity      |
| SkewArea                 | 1stDerivSkewAvgIntensity      | 2ndDerivSkewStdIntensity      |
| SkewAvgIntensity         | 1stDerivSkewStdIntensity      | 2ndDerivSkewQuality           |
| SkewStdIntensity         | 1stDerivSkewQuality           | 2ndDerivKurtCenterIntensity   |
| SkewQuality              | 1stDerivKurtCenterIntensity   | 2ndDerivKurtArea              |
| KurtCenterIntensity      | 1stDerivKurtArea              | 2ndDerivKurtAvgIntensity      |
| KurtArea                 | 1stDerivKurtAvgIntensity      | 2ndDerivKurtStdIntensity      |
| KurtAvgIntensity         | 1stDerivKurtStdIntensity      | 2ndDerivKurtQuality           |

**Table S1.** Handcrafted features tested with SVM and SFS.

**Supplemental Table S2**

| Day        | 1 | 2 | 3 | 4 |
|------------|---|---|---|---|
| Training   |   | x | x |   |
| Validation | x |   |   |   |
| Test       |   |   |   | x |

**Table S2.** Dataset 0 (*E. coli* and beads). Cross validation was applied for the first 3 days, which were used once for validation.

**Supplemental Table S3**

| Day        | 1 |   |   |   |   |   |   |   |
|------------|---|---|---|---|---|---|---|---|
| Sample     | 1 |   |   |   | 2 |   |   |   |
| Replicate  | 1 | 2 | 3 | 4 | 1 | 2 | 3 | 4 |
| Training   |   | x | x | x |   |   |   |   |
| Validation | x |   |   |   |   |   |   |   |
| Test       |   |   |   |   | x | x | x | x |

**Table S3.** Dataset 1 (*E. coli* and urine).

**Supplemental Table S4**

| Day        | 1 | 2 | 3 |   |   |   | 4 |  |  |  | 5 |  |  |  | 6 |  |  |  | 7 |   |   |   |
|------------|---|---|---|---|---|---|---|--|--|--|---|--|--|--|---|--|--|--|---|---|---|---|
| Sample     |   |   | 1 | 2 | 3 | 4 |   |  |  |  |   |  |  |  |   |  |  |  | 1 | 2 | 3 | 4 |
| Training   |   |   |   | x | x | x |   |  |  |  |   |  |  |  |   |  |  |  |   |   |   |   |
| Validation |   |   | x |   |   |   |   |  |  |  |   |  |  |  |   |  |  |  |   |   |   |   |
| Test       |   |   |   |   |   |   |   |  |  |  |   |  |  |  |   |  |  |  | x | x | x | x |

**Table S4.** Dataset 2 (*E. coli* and urine).

**Supplemental Table S5**

| Day        | 1 | 2 | 3 |   |   |   | 4 |   |   |   | 5 |   |   |   | 6 |   |   |   | 7 |   |   |   |
|------------|---|---|---|---|---|---|---|---|---|---|---|---|---|---|---|---|---|---|---|---|---|---|
| Sample     | 1 | 1 | 1 | 2 | 3 | 4 | 1 | 2 | 3 | 4 | 1 | 2 | 3 | 4 | 1 | 2 | 3 | 4 | 1 | 2 | 3 | 4 |
| Training   | x | x |   | x | x | x |   | x | x | x |   | x | x | x |   | x | x | x |   |   |   |   |
| Validation |   |   | x |   |   |   | x |   |   |   | x |   |   |   | x |   |   |   |   |   |   |   |
| Test       |   |   |   |   |   |   |   |   |   |   |   |   |   |   |   |   |   |   | x | x | x | x |

**Table S5.** Dataset 3 (*E. coli* and urine).
